# Supplementary material for: Atomic Poetry: Using Poetry To Teach Rutherford's Discovery of the Nucleus.
Source: Royal Society of Chemistry journal article supplement (doi:10.1039/c0dt00743a), 2001-01-01
Supplement: c0dt00743a.pdf [file c0dt00743a.pdf]

Supplementary Material

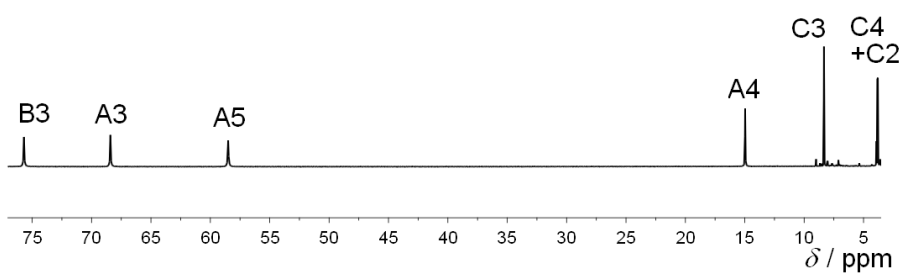

Fig. S1 Part of the 600 MHz  $^1\text{H}$  NMR spectrum of a  $(\text{CD}_3)_2\text{CO}$  solution of  $[\text{Fe}(\mathbf{2})_2][\text{PF}_6]_2$  at 295 K.

Table S1:

Comparison of Fe–H distances from X-ray diffraction ( $d1$ - $d4$ ) and PRE

| #  | $d1/\text{\AA}$ | $d2/\text{\AA}$ | $d3/\text{\AA}$ | $d4/\text{\AA}$ | $d_{av}/\text{\AA}$ | $d_{calc}/\text{\AA}$ | $Iw_{exp}/\text{Hz}$ |
|----|-----------------|-----------------|-----------------|-----------------|---------------------|-----------------------|----------------------|
| D2 | 3.57            | 3.07            | 3.06            | 3.70            | 3.35                | 3.65                  | 1440                 |
| D3 | 4.66            | 5.24            | 4.63            | 5.32            | 4.96                | 5.16                  | 180                  |
| D5 | 5.92            | 6.35            | 6.02            | 6.27            | 6.14                | 5.79                  | 90                   |
| D6 | 4.83            | 5.11            | 4.93            | 4.94            | 4.95                | 5.03                  | 210                  |
| A3 | 4.99            | 5.03            | 5.04            | 4.94            | 5.00                | 4.99                  | 220                  |
| A4 | 5.87            | 5.87            | 5.92            | 5.82            | 5.87                | 5.79                  | 90                   |
| A5 | 5.33            | 5.19            | 5.25            | 5.30            | 5.27                | 5.03                  | 210                  |
| B3 | 5.04            | 5.01            | 5.02            | 5.00            | 5.02                | 5.03                  | 210                  |
